# Supplementary material for: Magnetic field-oriented ferroferric oxide/poly(2,6-dimethyl-1,4-phenylene oxide) hybrid membranes for anion exchange membrane applications
Source: Royal Society of Chemistry journal article supplement (doi:10.1039/c8nr06048g), 2018-01-01
Supplement: c8nr06048g1.pdf [file c8nr06048g1.pdf]

Supporting Information for:

**Magnetic field-oriented ferroferric oxide/poly(2,6-dimethyl-1,4-phenylene oxide) hybrid membrane for anion exchange membrane applications**

Nanjun Chen, Dong Wang, Chuan Long, Yunxi Li, Chuanrui Lu, Fanghui Wang\*, Hong Zhu\*  
State Key Laboratory of Chemical Resource Engineering, Institute of Modern Catalysis,  
Department of Organic Chemistry, School of Science, Beijing University of Chemical  
Technology, Beijing, 100029, P. R. China [Tel:+86-10-64444919](tel:+86-10-64444919);  
E-mail: zhuh0128@126.com

**Content**

**Characterization of Membrane**

**Fig. S1** FTIR spectra of QA-Fe<sub>3</sub>O<sub>4</sub>, TA-PPO, and QA-Fe<sub>3</sub>O<sub>4</sub>/TA-PPO.

**Fig. S2** <sup>1</sup>HNMR spectra of TA-PPO polyelectrolyte after alkaline treatment in 1 M NaOH at 80 °C for 500 h.

**Characterization of Membrane**

**Nuclear Magnetic Resonance (NMR) Characterization**

A Bruker AV 400 NMR spectrometer (400 MHz) was used to analyze the structure of triple-ammonium precursor and TA-PPO polyelectrolyte. Typically, DMSO-d<sub>6</sub>/D<sub>2</sub>O was chosen as the mixed solvent to better analyze the chemical structure of TA-PPO polyelectrolyte, on account of this solvent system can eliminate the negative effect of H<sub>2</sub>O (3.34 ppm) on ammonium groups in <sup>1</sup>HNMR spectra.

**Morphology and Crystal structure Analysis**

X-ray diffraction (XRD) patterns of the Fe<sub>3</sub>O<sub>4</sub> and QA-Fe<sub>3</sub>O<sub>4</sub> were recorded on a Japan Shimadzu XD-3A diffractometer with a Cu K $\alpha$  radiation ( $\lambda = 1.54 \text{ \AA}$ ). Scanning electron microscopy (SEM, Zeiss Supra 55) with EDX-linear scanning analysis was used to observe the morphology of the aligned QA-Fe<sub>3</sub>O<sub>4</sub>/TA-PPO hybrid membrane, and SEM analysis was operated at 15 kV. Besides, the micro-phase structure of the TA-PPO membrane in Br<sup>-</sup> form was further revealed by atomic force microscopy (AFM, DI

Multimode V, Bruker Co.) and transmission electron microscope (TEM, Hitachi HT7700).

### **Thermal stability and mechanical properties**

The thermal decomposition of membrane samples was evaluated by thermogravimetric analysis (TGA) on a TG209C thermogravimetric analyzer with operating temperature from 30 to 800 °C under a N<sub>2</sub> atmosphere at a heating rate of 10 °C min<sup>-1</sup>. Mechanical properties of membrane samples were performed on an Instron Model 1185 instrument at 70% humidity. A membrane sample was cut into a dumbbell shape, and the length and width of effective sample domains are 20 mm and 4 mm, respectively) and the measurement is performed at a crosshead speed of 10 mm·min<sup>-1</sup> at 25 °C.

### **Physical properties**

Ion exchange capacity (IEC): The back titration method is used to determine the IEC of membrane samples. In detail, a dried membrane (OH<sup>-</sup> form) was soaked in standard HCl solution (0.01 M) for 24 h. Subsequently, a standard NaOH solution (0.01 M) was used to titrate the HCl solution with a phenolphthalein indicator. The IEC value is determined as follows:

$$IEC = \frac{C_1V_1 - C_2V_2}{m_{dry}} \quad (1)$$

$m_{dry}$  is dry weight of a membrane sample, which is obtained after drying the membrane (Cl<sup>-</sup> form) to constant weight.  $C_1$  and  $V_1$  are the concentration and volume of HCl solution, and  $C_2$  and  $V_2$  represent the concentration and volume of NaOH solution, respectively.

Water uptake (Wu) and swelling ratio (Sr): The variation of membrane weight was used to determine the Wu and Sr. Typically, a membrane sample in OH<sup>-</sup> form was soaked in deionized water for 24 h, and the weight ( $W_1$ ) and length ( $D_1$ ) of the membrane were immediately measured after wiping excessive water on the membrane. Then, the membrane sample was dried in a vacuum oven to a constant weight and recorded the

weight ( $W_2$ ) and length ( $D_2$ ). The  $W_u$  and  $S_r$  of the membrane sample can be determined by follow equations.

$$W_u (\%) = \frac{M_1 - M_2}{M_2} \times 100\% \quad (2)$$

$$S_r (\%) = \frac{D_1 - D_2}{D_2} \times 100\% \quad (3)$$

### **Membrane conductivity**

A two-electrode AC impedance method was used to test the longitudinal ion conductivity of membrane samples on a Zahner Ennium electrochemical workstation with AC frequency ranges from 1 Hz to 100 kHz. The membrane sample ( $\text{OH}^-$  form) was soaked in degassed and deionized water exceeding 24 h to remove excess salt on the membrane. The effective contact area ( $S$ ) of the membrane and thickness ( $d$ ) of membrane samples were recorded. The high frequency impedance was used to calculate the ion conductivity as follows:

$$\sigma = \frac{d}{RS} \quad (4)$$

$R$  ( $\Omega$ ) represents the membrane resistance.

### **Alkaline stability**

The QA- $\text{Fe}_3\text{O}_4$ /TA-PPO membrane sample was exposed in 1 M NaOH at 80 °C under  $\text{N}_2$  protection for various times. The variation of membrane conductivity was used to assess the alkaline stability of the membrane sample. Besides, for better investigating TA-PPO membrane stability,  $^1\text{H}$ NMR spectroscopy was further used to detect the structure variation of the membrane in DMSO- $d_6$  solution. 6%-10% of trifluoroacetic acid (TFA) was chosen as co-solvent to dissolve the TA-PPO polyelectrolyte after alkaline treatment. The NaOH solution was updated every 3 days.

### **Single cell performance**

The TA-PPO (IEC=2.31  $\text{mmolg}^{-1}$ ,  $75 \pm 3$   $\mu\text{m}$ ) and aligned 6%-QA- $\text{Fe}_3\text{O}_4$ /TA-PPO (IEC=2.32  $\text{mmolg}^{-1}$ ,  $75 \pm 3$   $\mu\text{m}$ ) membranes were used to evaluate the single cell

performance. The membrane samples are assembled into membrane electrode assemblies (MEAs) with catalyst-loaded gas diffusion layer (GDL) (40%, Pt/C catalyst, Johnson Matthey Co.). The fuel cell performance of the MEAs is performed in a HephassMini-L100 fuel cell system at 80 °C. The both humidity temperatures of anode and cathode are carried out at 85 °C with at a backpressure of 0.1 MPa. The Pt loadings at both anode and cathode are 0.4 mg Pt cm<sup>-2</sup>, and the area of electrode is 5 cm<sup>2</sup>. The humidified gas was controlled at 300 mL/min for both H<sub>2</sub> and O<sub>2</sub>.

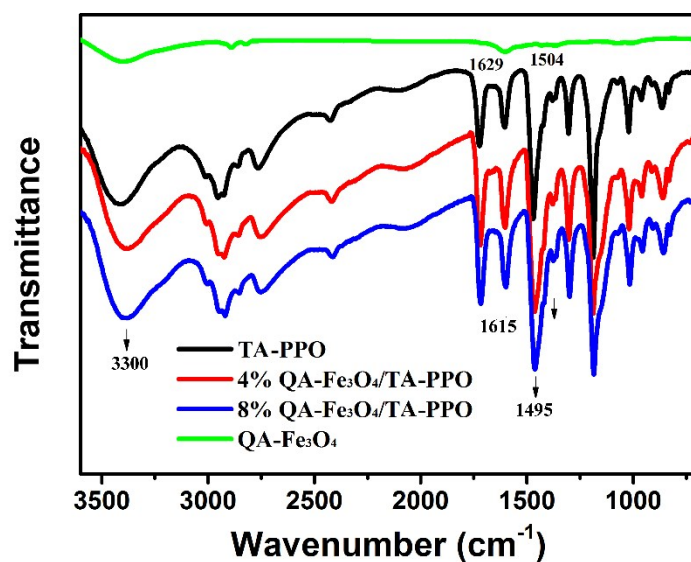

Fig. S1 FTIR spectra of QA-Fe<sub>3</sub>O<sub>4</sub>, TA-PPO, and QA-Fe<sub>3</sub>O<sub>4</sub>/ TA-PPO.

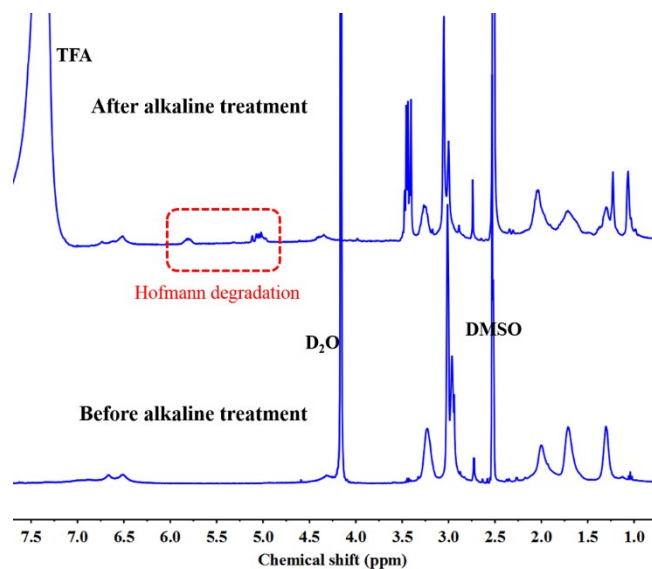

**Fig. S2**  $^1\text{H}$ NMR spectra of TA-PPO polyelectrolyte after alkaline treatment in 1 M NaOH at 80 °C for 500 h.
